# Supplementary material for: Composite regulation of ERK activity dynamics underlying tumour-specific traits in the intestine
Source: PubMed Central journal article supplement (PMC5988836; doi:10.1038/s41467-018-04527-8), 2018-06-05
Supplement: 41467_2018_4527_MOESM1_ESM.pdf [file 41467_2018_4527_MOESM1_ESM.pdf]

# **Composite regulation of ERK activity dynamics underlying tumour-specific traits in the intestine**

Yu Muta et al.

Supplementary Information includes

Supplementary Figures: pages 2-13

Supplementary Table 1: page 14

Supplementary Table 2: page 15

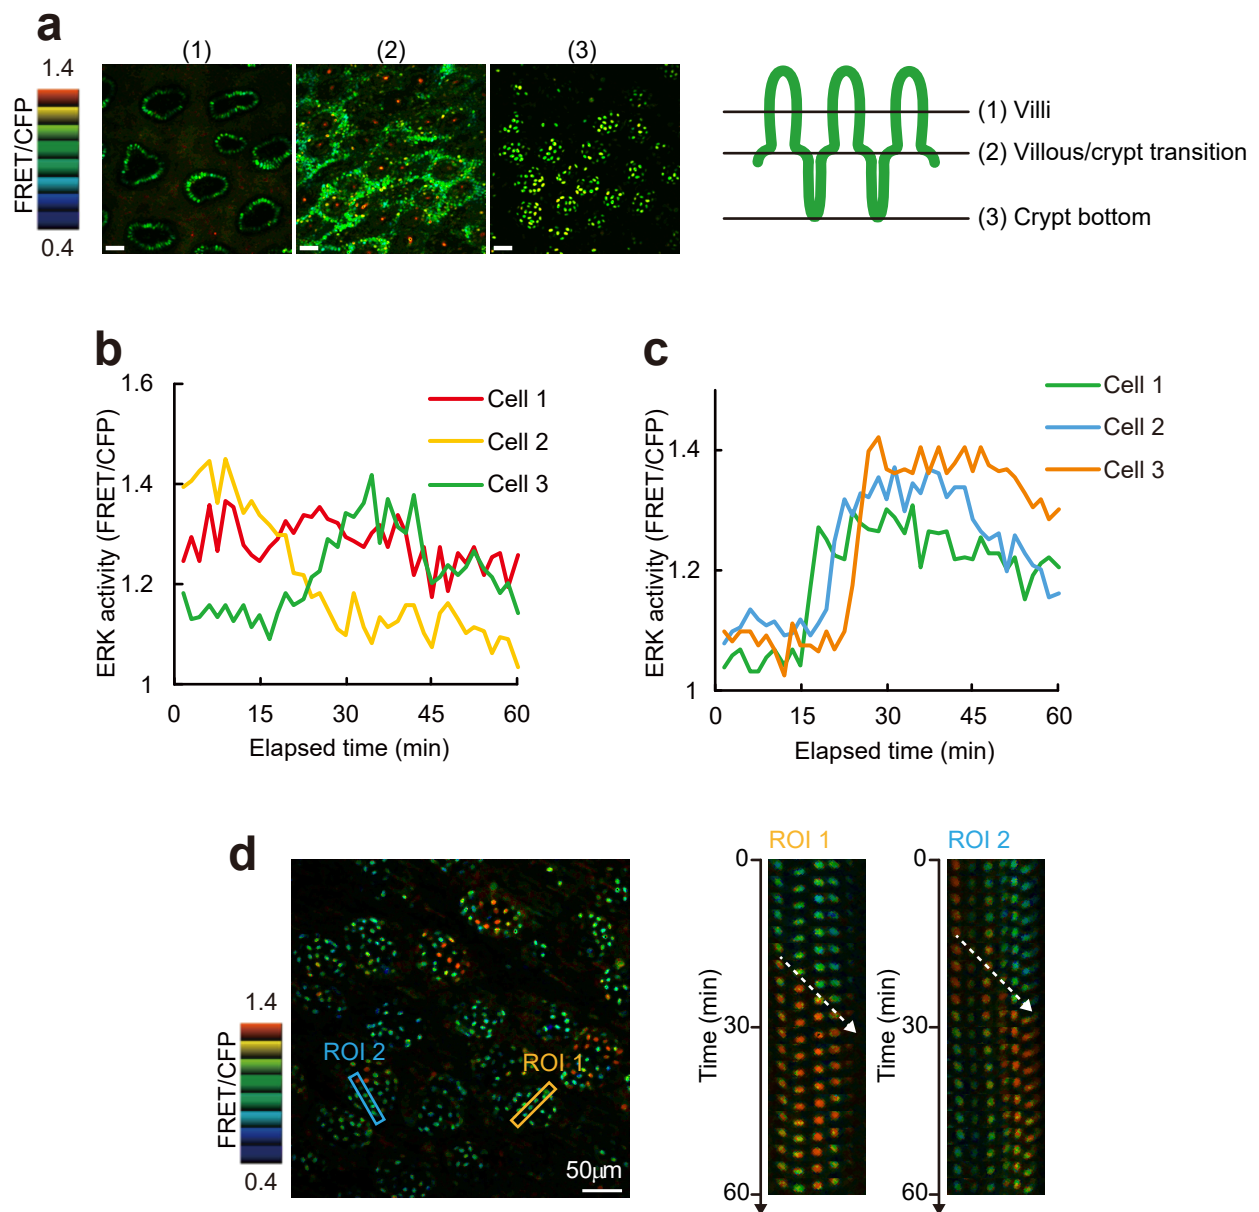

**Supplementary Figure 1. ERK activity dynamics in the mouse small intestine.** (a) In vivo imaging of the small intestine in EKAREV-NLS mice. The planes in each picture (1-3) correspond to schematic illustrations showing villi (1), transition between villi and crypts (2), and the crypt bottoms (3), respectively. Images are shown in the intensity-modulated display (IMD) mode. (b, c) The original time course data of ERK activity in the mouse intestinal epithelium before smoothing by the moving average. The data were analysed and used for Fig. 1h (b), and Fig. 1j (c). (d) Kymographs of in vivo imaging data showing the lateral propagation of ERK activity (right). Each graph was generated from the region of interest (ROI) indicated in the reference image (left). Scale bars, 50  $\mu$ m.

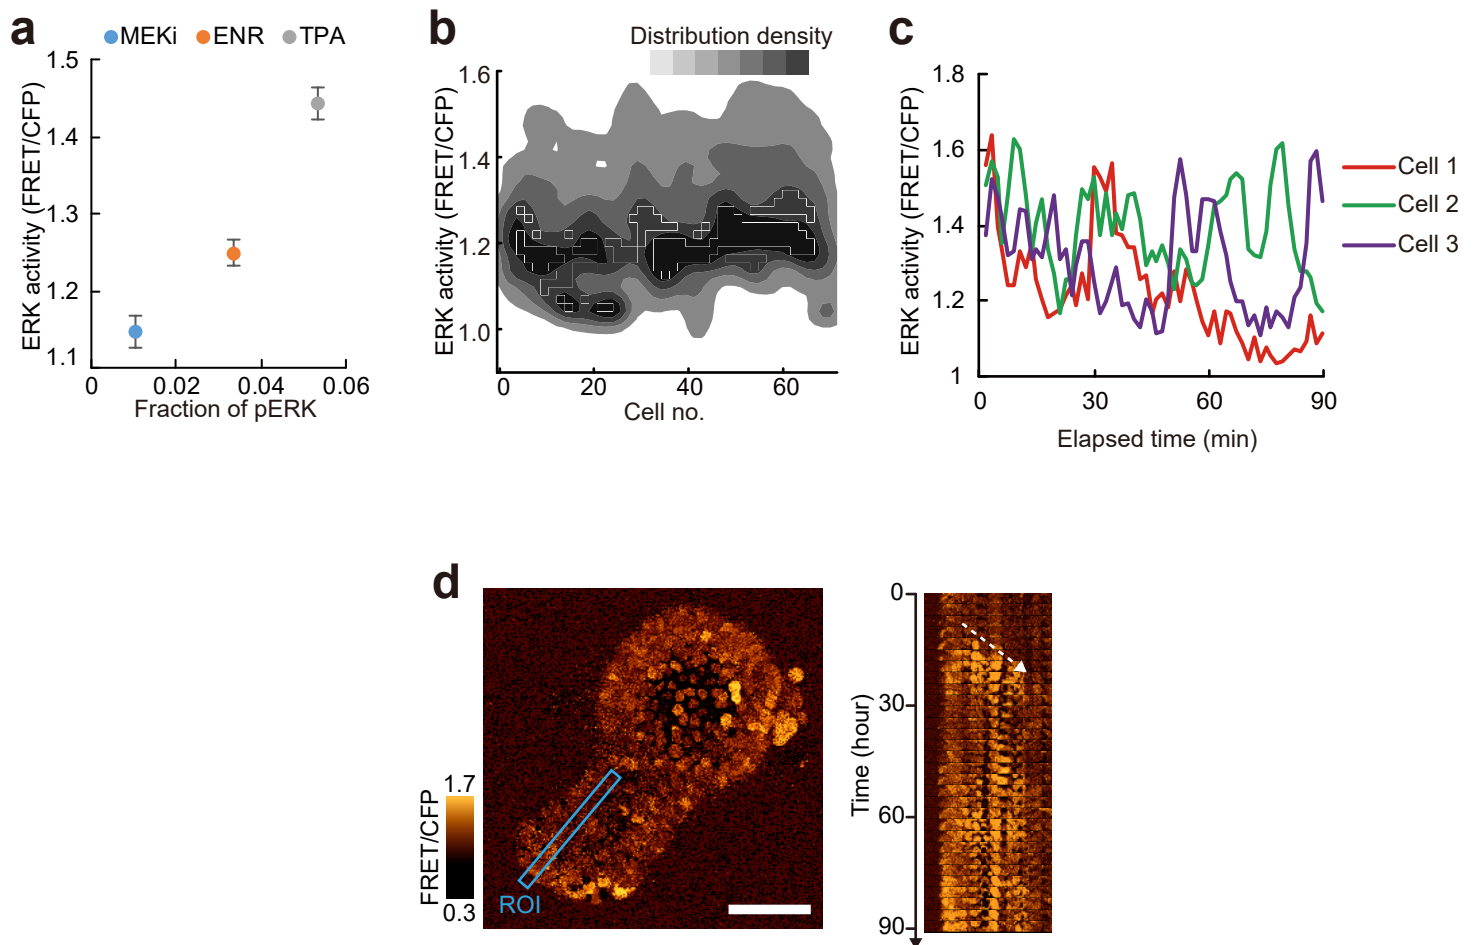

**Supplementary Figure 2. Pulse like ERK activation and propagation in the intestinal organoids.** (a) Organoids cultured in the ENR media were treated with vehicle (ENR), 200 nM of a MEK inhibitor, PD0325901 (MEKi), or 500 nM of TPA. Live imaging was performed 60 min after the treatment, and the FRET/CFP ratios under each condition were quantified. In parallel, organoids treated under the same condition were lysed with SDS sample buffer and subjected to immunoblotting with anti-ERK and anti-phosphorylated ERK (pERK) antibodies. The fraction of pERK/ERK was determined by comparing the relative amount of ERK and pERK to a reference sample whose pERK/ERK ratio was quantified based on the phosphorylation-dependent mobility shift of ERK in SDS-PAGE. (b) Distribution density of ERK activity in each cell. Darker colours indicate that the ERK activity was at the indicated value for a longer time ( $n = 71$  cells). (c) The original time course data of ERK activity in an intestinal organoid before smoothing by the moving average. The data were analysed and used for Fig. 3c. (d) A kymograph of time lapse imaging of an intestinal organoid (right) showing the lateral propagation of ERK activity. A region of interest (ROI) used to make the kymograph is shown in the reference image (left). Error bars represent s.e.m. Scale bars, 50  $\mu\text{m}$ .

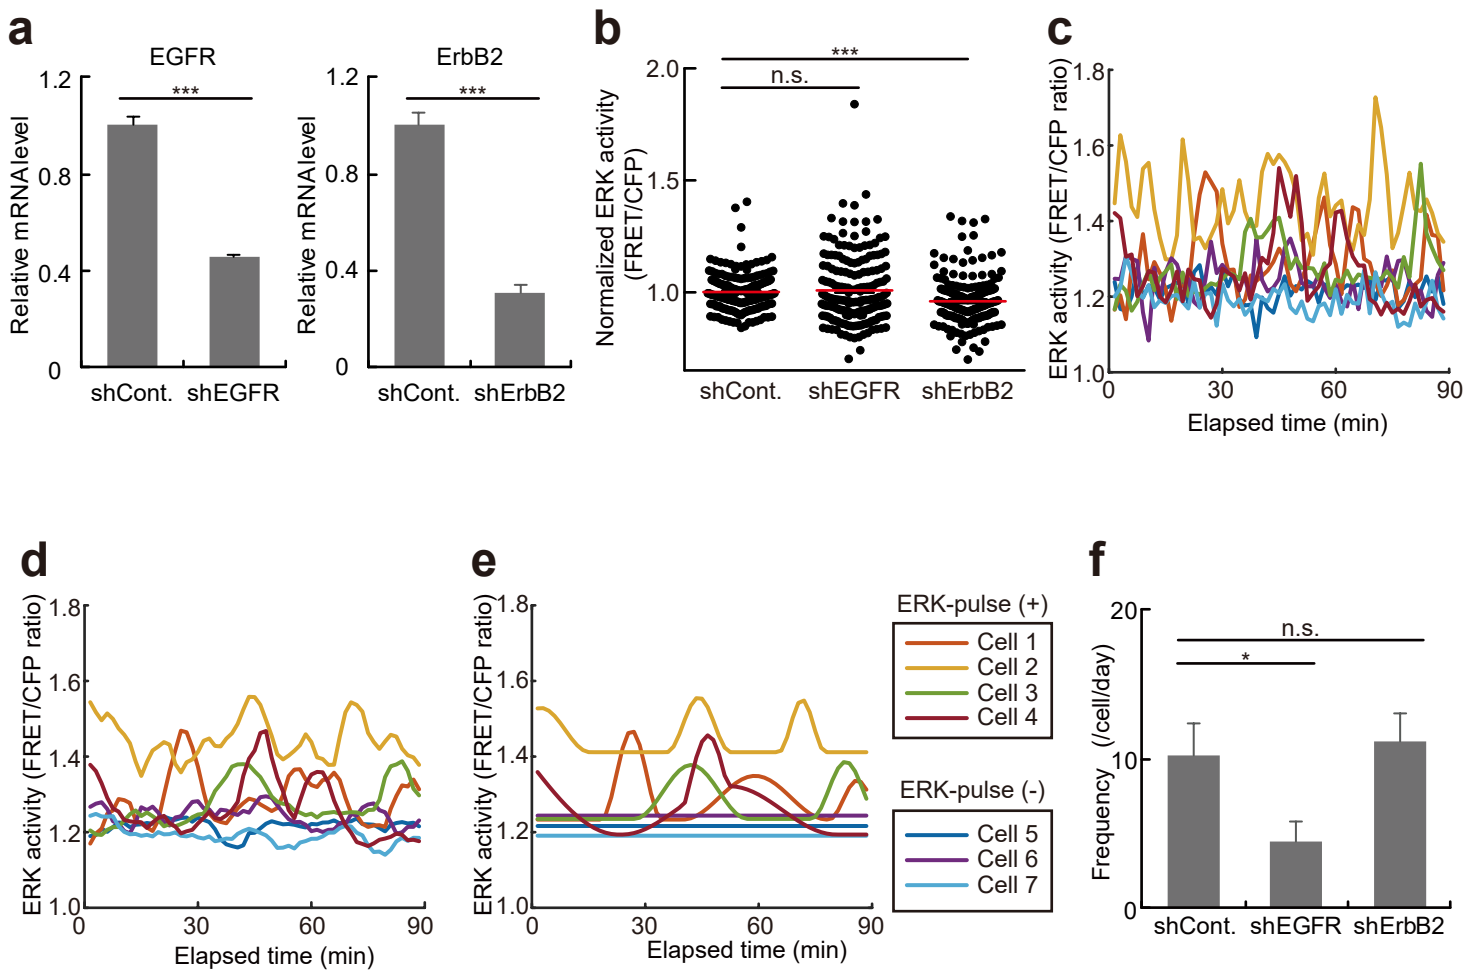

**Supplementary Figure 3. ERK activity dynamics regulated by EGFR and ErbB2 signalling.** (a) The relative mRNA levels of EGFR (left) and ErbB2 (right) in MC-38 cells expressing a control shRNA (shCont.), or a shRNA for either EGFR (shEGFR) or ErbB2 (shErbB2) were analysed by RT-PCR (n = 5 samples). (b) Bee swarm plots of ERK activity in the organoids infected with lentiviruses expressing shCont., shEGFR, or shErbB2 (shCont.: n = 200, shEGFR: n = 190, shErbB2: n = 199 cells, pooled from 5 organoids). (c-e) Multi-peak and flat line fitting of the ERK activity data obtained from the 7 representative cells. The raw data (c) were smoothed by 6-min moving average (d), and fitted to flat lines or multi-peak functions (e). Cells whose data successfully fitted to multi-peak functions were defined as “ERK-pulse+” (Cell 1-4), and the others were defined as “ERK-pulse-” (Cell 5-7). (f) Quantification of the ERK activity pulses in organoids expressing shCont., shEGFR, or shErbB2. ERK activity data from each cell were processed as described for Figure 4e (shCont.: n = 50, shEGFR: n = 50, shErbB2: n = 49 cells). Red lines represent mean. Error bars represent s.e.m. Welch’ s t test (a) and Steel-Dwass test (b, f) were used for comparison. \*P < 0.05, \*\* P < 0.001, \*\*\*P < 0.0001, n.s., not significant.

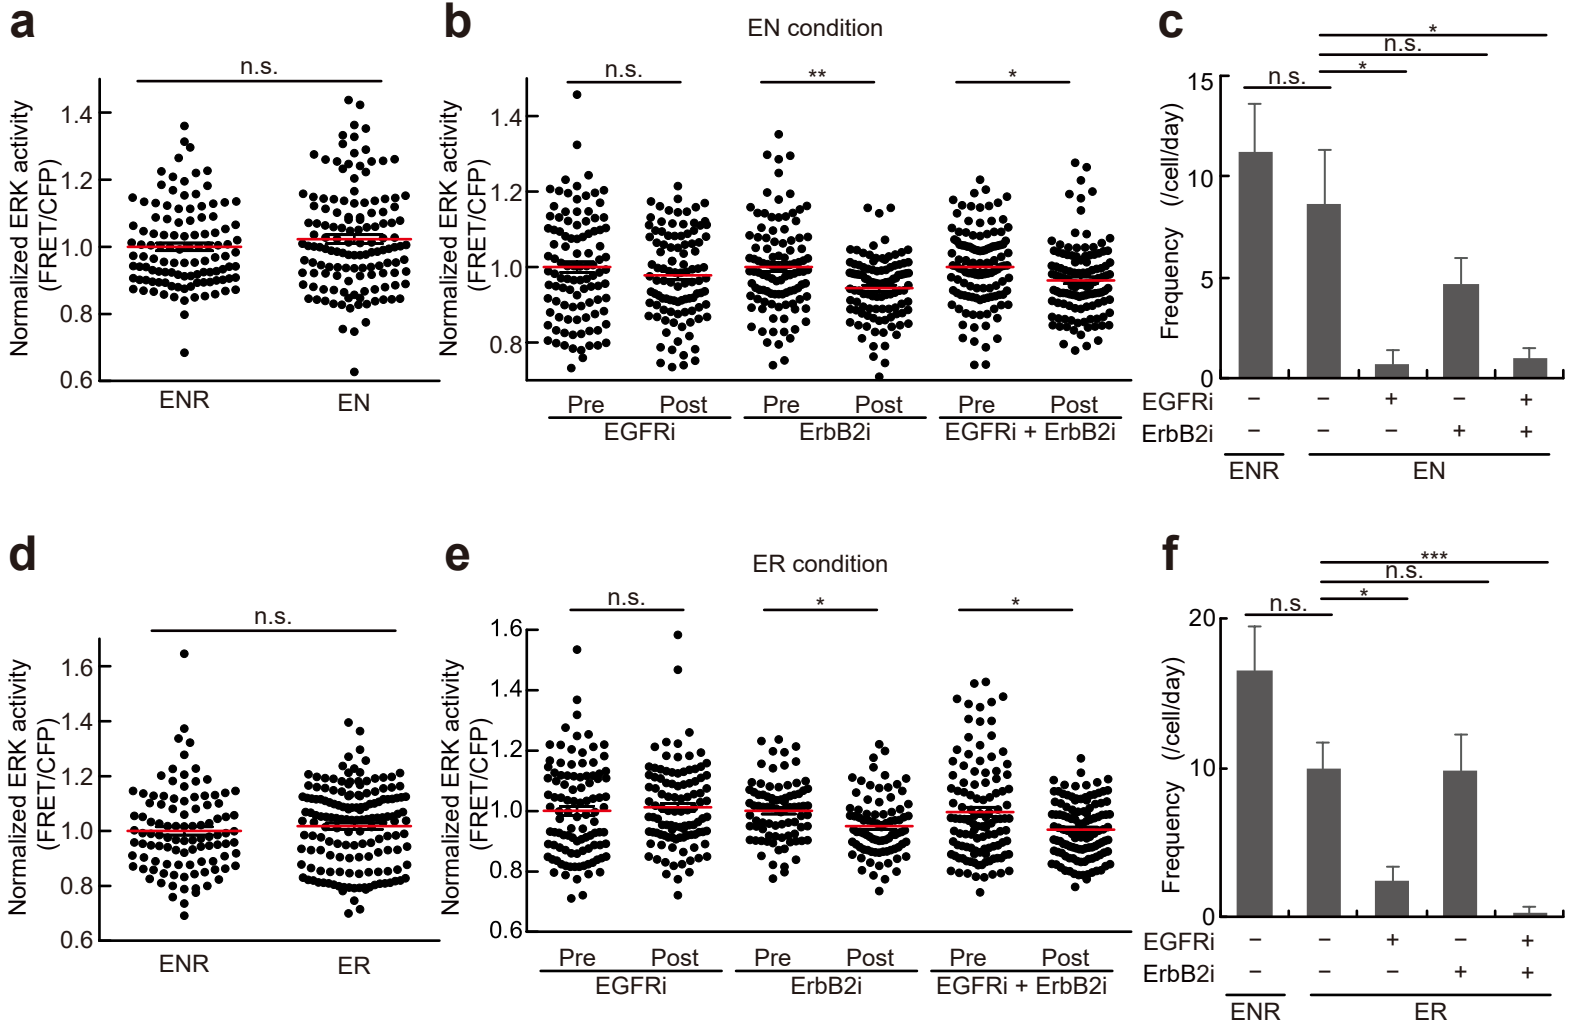

**Supplementary Figure 4. Effects of R-spondin 1 or Noggin depletion in ERK activity dynamics.** (a-c) Organoids were cultured in the R-spondin 1-depleted (EN) media for 24 h before imaging. (a) Bee swarm plots of ERK activity in organoids cultured in the ENR or EN media (n = 111 (ENR) and 133 (EN) cells pooled from 3 organoids). (b, c) Organoids cultured in the EN media were treated with 1  $\mu$ M of an EGFR inhibitor (EGFRi), PD153035, and/or 10  $\mu$ M of an ErbB2 inhibitor (ErbB2i), CP-724714. (b) Bee swarm plots of ERK activity before and after inhibitor treatment (EGFRi: n = 102, ErbB2i: n = 105, EGFRi + ErbB2i: n = 120 cells, pooled from 3 organoids). (c) Quantification of ERK activity pulses in organoids cultured in the ENR or EN media. Organoids were treated with EGFR and/or ErbB2 inhibitors, and then imaged for 90 min. ERK activity data from each cell were processed as described for Figure 4e (ENR/-/-: n = 40, EN/-/-: n = 35, EN/EGFRi/-: n = 48, EN/-/ ErbB2i: n = 31, EN/EGFRi/ ErbB2i: n = 50 cells). (d-f) Organoids were cultured in the Noggin-depleted (ER) media for 24 h before imaging. (d) Bee swarm plots of ERK activity in organoids cultured in the ENR or ER media (n = 102 (ENR) and 156 (ER) cells pooled from 3 organoids). (e, f) Organoids cultured in the ER media were treated with 1  $\mu$ M of an EGFR inhibitor (EGFRi), PD153035, and/or 10  $\mu$ M of an ErbB2 inhibitor (ErbB2i), CP-724714. (e) Bee swarm plots of ERK activity before and after inhibitor treatment (EGFRi: n = 102, ErbB2i: n = 83, EGFRi + ErbB2i: n = 15 cells, pooled from at least 2 organoids). (f) Quantification of ERK activity pulses in organoids cultured in the ENR or ER media. Organoids were treated with EGFR and/or ErbB2 inhibitors, and then imaged for 90 min. ERK activity data from each cell were processed as described for Figure 4e (ENR/-/-: n = 34, ER/-/-: n = 50, ER/EGFRi/-: n = 65, ER/-/ ErbB2i: n = 39, ER/EGFRi/ ErbB2i: n = 46 cells). Red lines represent mean. Error bars represent s.e.m. Mann-Whitney U-test (a, b, d, e) and Steel-Dwass test (c, f) were used for comparison. \*P < 0.05, \*\* P < 0.001, \*\*\*P < 0.0001, n.s., not significant.

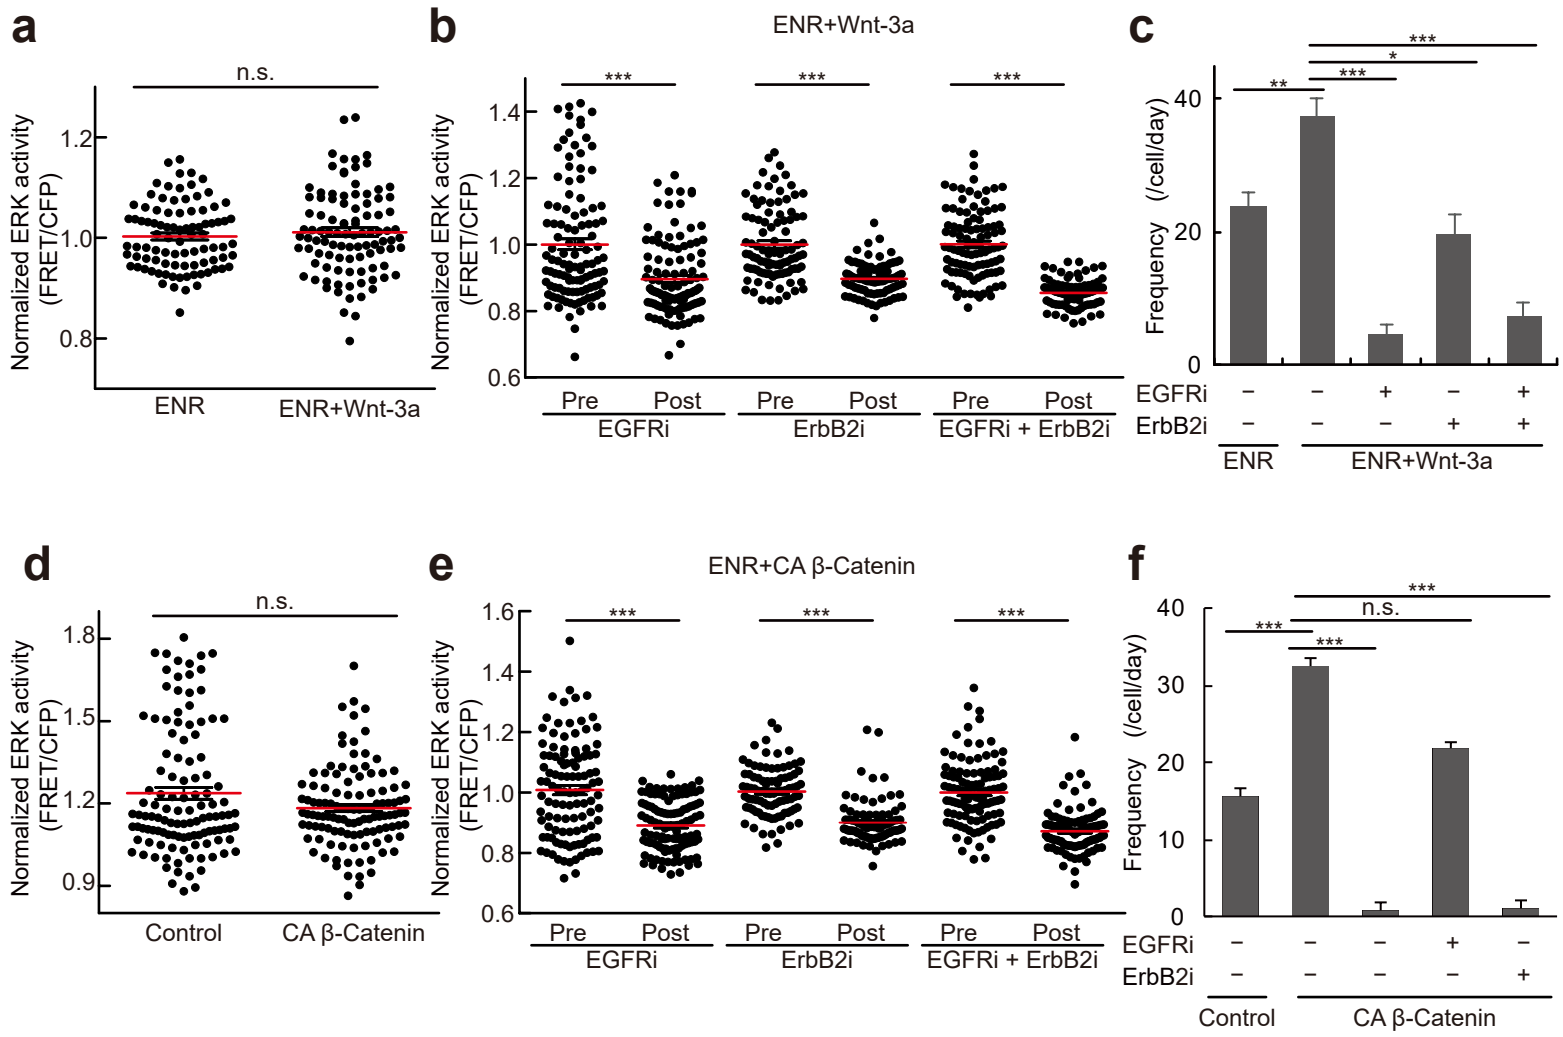

**Supplementary Figure 5. Effects of Wnt signalling activation in ERK activity dynamics.**

**(a-c)** Organoids were cultured in ENR media supplemented with 100 ng ml<sup>-1</sup> of Wnt3a (ENR + Wnt3a) for 24 h before imaging. **(a)** Bee swarm plots of ERK activity in organoids cultured in the ENR or ENR + Wnt3a media (n = 90 (ENR) and 98 (ENR + Wnt3a) cells pooled from 3 organoids). **(b, c)** Organoids cultured in the ENR + Wnt3a media were treated with 1 μM of an EGFR inhibitor (EGFRi), PD153035, and/or 10 μM of an ErbB2 inhibitor (ErbB2i), CP-724714. **(b)** Bee swarm plots of ERK activity before and after inhibitor treatment (EGFRi: n = 112, ErbB2i: n = 98, EGFRi + ErbB2i: n = 100 cells, pooled from 3 organoids). **(c)** Quantification of ERK activity pulses in organoids cultured in the ENR or ENR + Wnt3a media. Organoids were treated with EGFR and/or ErbB2 inhibitors, and then imaged for 90 min. ERK activity data from each cell were processed as described for Figure 4e (ENR/-/-: n = 74, Wnt3a/-/-: n = 32, Wnt3a/EGFRi/-/: n = 41, Wnt3a/-/ ErbB2i: n = 35, Wnt3a/EGFRi/ ErbB2i: n = 37 cells). **(d)** Bee swarm plots of the ERK activity in the organoids infected with a control lentivirus (control) or a lentivirus expressing constitutively active form of β-Catenin (CA β-Catenin) (Control : n = 116, CA β-Catenin: n = 114 cells, from 4 organoids). **(e, f)** Organoids expressing CA β-Catenin were treated with 1 μM of an EGFR inhibitor (EGFRi), PD153035, and/or 10 μM of an ErbB2 inhibitor (ErbB2i), CP-724714. **(e)** Bee swarm plots of ERK activity before and after inhibitor treatment (EGFRi: n = 110, ErbB2i: n = 90, EGFRi + ErbB2i: n = 108 cells, pooled from at least 2 organoids). **(f)** Quantification of ERK activity pulses in control and CA β-Catenin organoids. Organoids were treated with EGFR and/or ErbB2 inhibitors, and then imaged for 90 min. ERK activity data from each cell were processed as described for Figure 4e (Control/-/-: n = 54, CA β-Catenin /-/-: n = 64, CA β-Catenin /EGFRi/-/: n = 55, CA β-Catenin /-/ ErbB2i: n = 25, CA β-Catenin /EGFRi/ ErbB2i: n = 71 cells). Red lines represent mean. Error bars represent s.e.m. Mann–Whitney U-test (**a, b, d, e**) and Steel-Dwass test (**c, f**) were used for comparison. \*P < 0.05, \*\* P < 0.001, \*\*\*P < 0.0001, n.s., not significant.



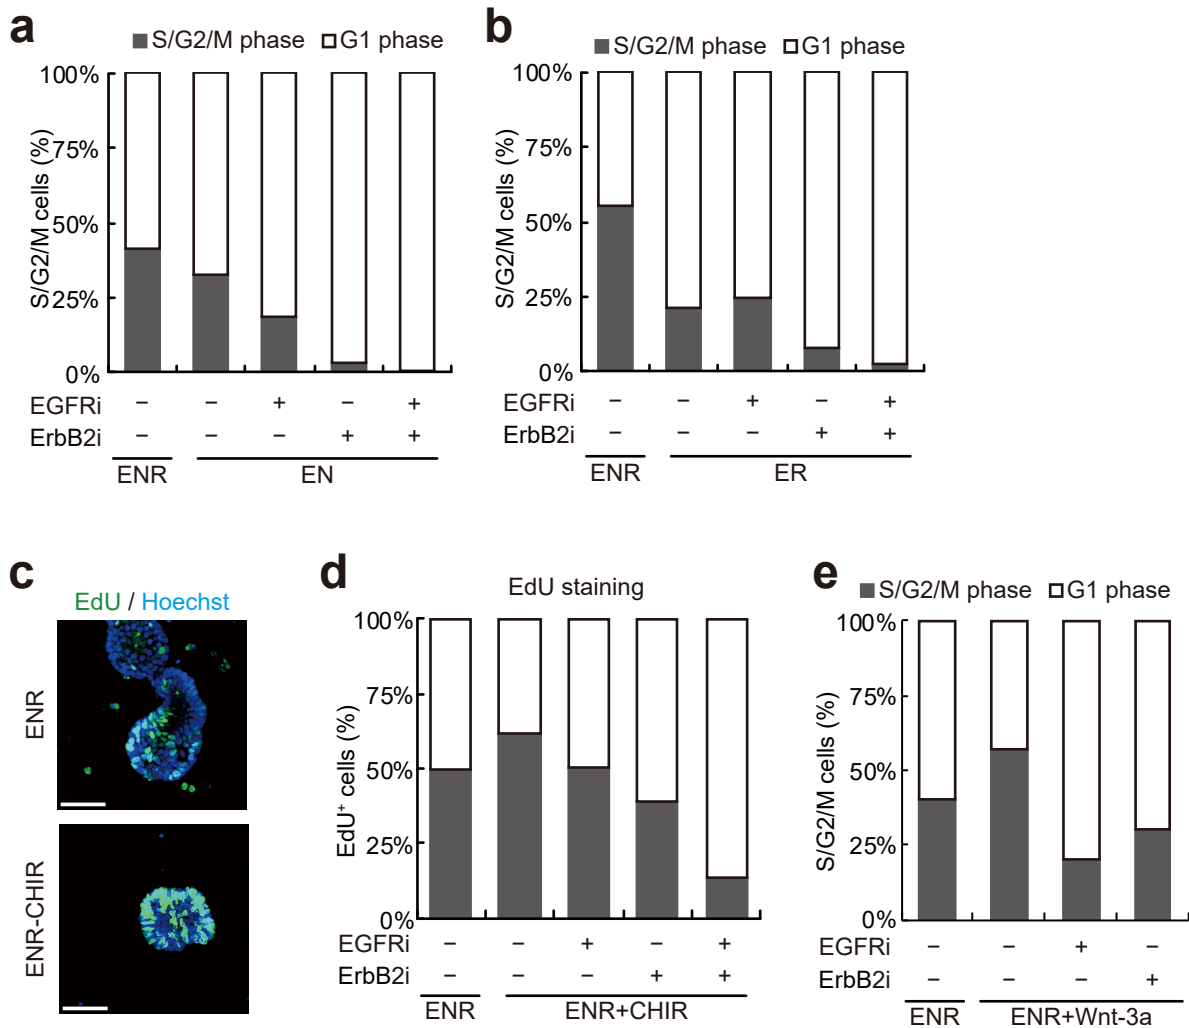

**Supplementary Figure 6. Cell cycle analyses of organoids under different conditions.** (a, b) Proportion of cells in the S/G2/M phases in Fucci2a organoids cultured under different conditions. (a) Organoids were cultured in the R-spondin 1-depleted media (EN) supplemented with EGFRi and/or ErbB2i for 24 h. (ENR/-/-: n = 427, EN/-/-: n = 343, EN/EGFRi/-: n = 369, EN-/ErbB2i: n = 249, and EN/EGFRi/ErbB2i/ n = 202 cells from 3 organoids) (b) Organoids were cultured in the Noggin-depleted media (ER) supplemented with EGFRi and/or ErbB2i for 24 h. (ENR/-/-: n = 226, ER/-/-: n = 312, ER/EGFRi/-: n = 242, ER-/ErbB2i: n = 155, and ER/EGFRi/ErbB2i/ n = 252 cells from 3 organoids) (c, d) EdU staining of organoids treated with CHIR99021, an EGFR inhibitor, and/or an ErbB2 inhibitor for 24 h. Representative images (c) and proportion of EdU+ cells under different conditions (d) (ENR/-/-: n = 499, CHIR/-/-: n = 482, CHIR/EGFRi/-: n = 259, CHIR-/ErbB2i: n = 267, and CHIR/EGFRi/ErbB2i/ n = 245 cells from more than 3 organoids). (e) Fucci2a organoids were treated with Wnt-3a, EGFRi, and/or ErbB2i for 24 h. Proportion of cells in the S/G2/M phases is shown. (ENR/-/-: n = 292, Wnt3a/-/-: n = 290, Wnt3a/EGFRi/-: n = 196, Wnt3a-/ErbB2i: n = 240 cells from 3 organoids). Scale bars, 50  $\mu$ m.

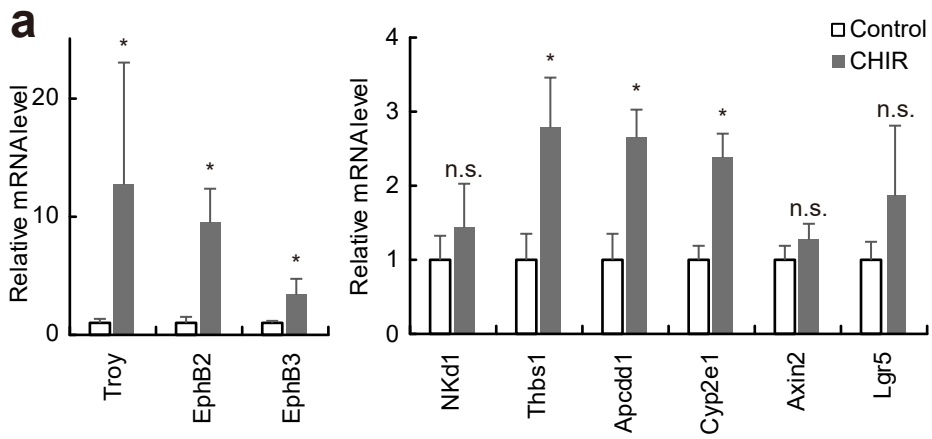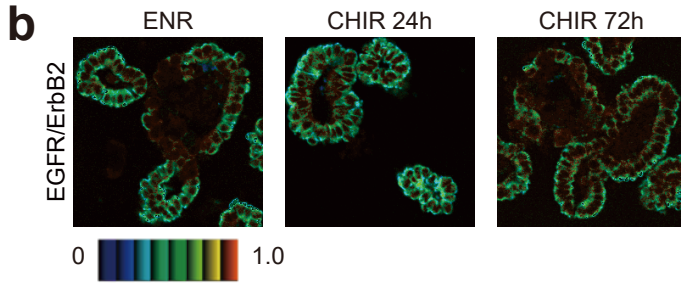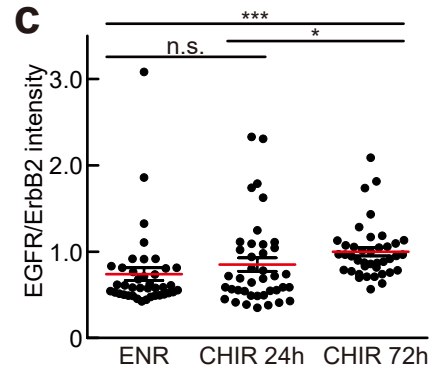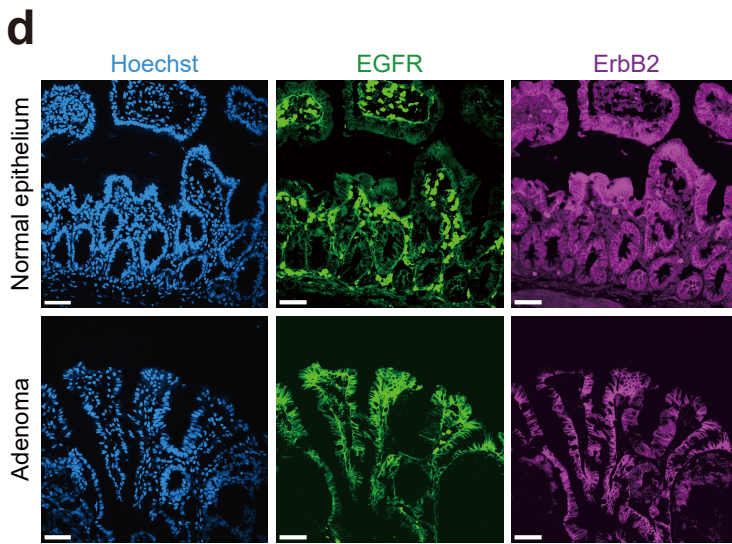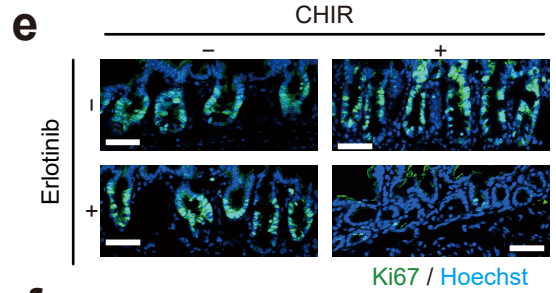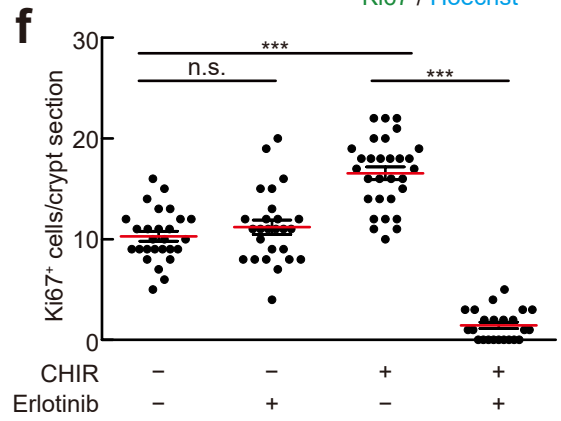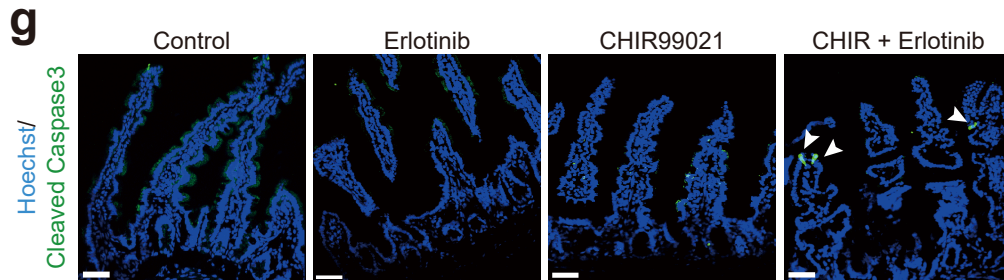

**Supplementary Figure 7. Analyses of adenomas and CHIR99021 treatment in vivo. (a)**

The relative mRNA levels of the Wnt-target genes in the isolated small intestinal epithelial cells of control and CHIR99021-treated mice (CHIR) were analysed by RT-PCR. Mice were injected with vehicle or 20 mg kg<sup>-1</sup> of CHIR99021 for 3 days (n = 6 mice respectively). **(b, c)** Immunofluorescence staining with anti-EGFR and anti-ErbB2 antibodies of intestinal organoids treated with 5 μM of CHIR99021 for different duration; 0h (ENR), 24 h (CHIR 24h) and 72 h (CHIR 72h). The ratio of the EGFR and ErbB2 staining intensity in the IMD mode **(b)** and the bee swarm plots of the EGFR/ErbB2 staining intensity ratio **(c)** are shown (n = 40 cells pooled from 3 organoids). **(d)** Immunofluorescence staining of an adenoma and the normal small intestine of ApcΔ716 mice with anti-EGFR and anti-ErbB2 antibodies. The nuclei of cells were co-stained with Hoechst. Note that strong staining of cells under the submucosal layer results from non-specific binding of the secondary antibodies used here (anti-mouse IgG) to immune cells. **(e)** Immunofluorescence staining of the small intestine of CHIR99021- and/or erlotinib-treated mice with an anti-Ki67 antibody. The nuclei of cells were co-stained with Hoechst. **(f)** Quantification of Ki67<sup>+</sup> cells per crypt section (-/-: n = 27, CHIR/-: n = 30, -/Erlotinib: n = 26, and CHIR/Erlotinib: n = 23 crypts). **(g)** Immunofluorescence staining of the small intestine of CHIR99021- and/or erlotinib-treated mice with an anti-cleaved caspase3 antibody. Mice were injected with vehicle, 20 mg kg<sup>-1</sup> of CHIR99021, and/or 100 mg kg<sup>-1</sup> of erlotinib for 3 days. Apoptotic cells were indicated by white arrowheads. Scale bars, 50 μm. Red lines represent mean. Error bars represent s.e.m. Mann–Whitney U-test **(a)**, and Steel-Dwass test **(c, f)** were used for comparison. \*P < 0.05, \*\* P < 0.001, \*\*\*P < 0.0001, n.s., not significant.

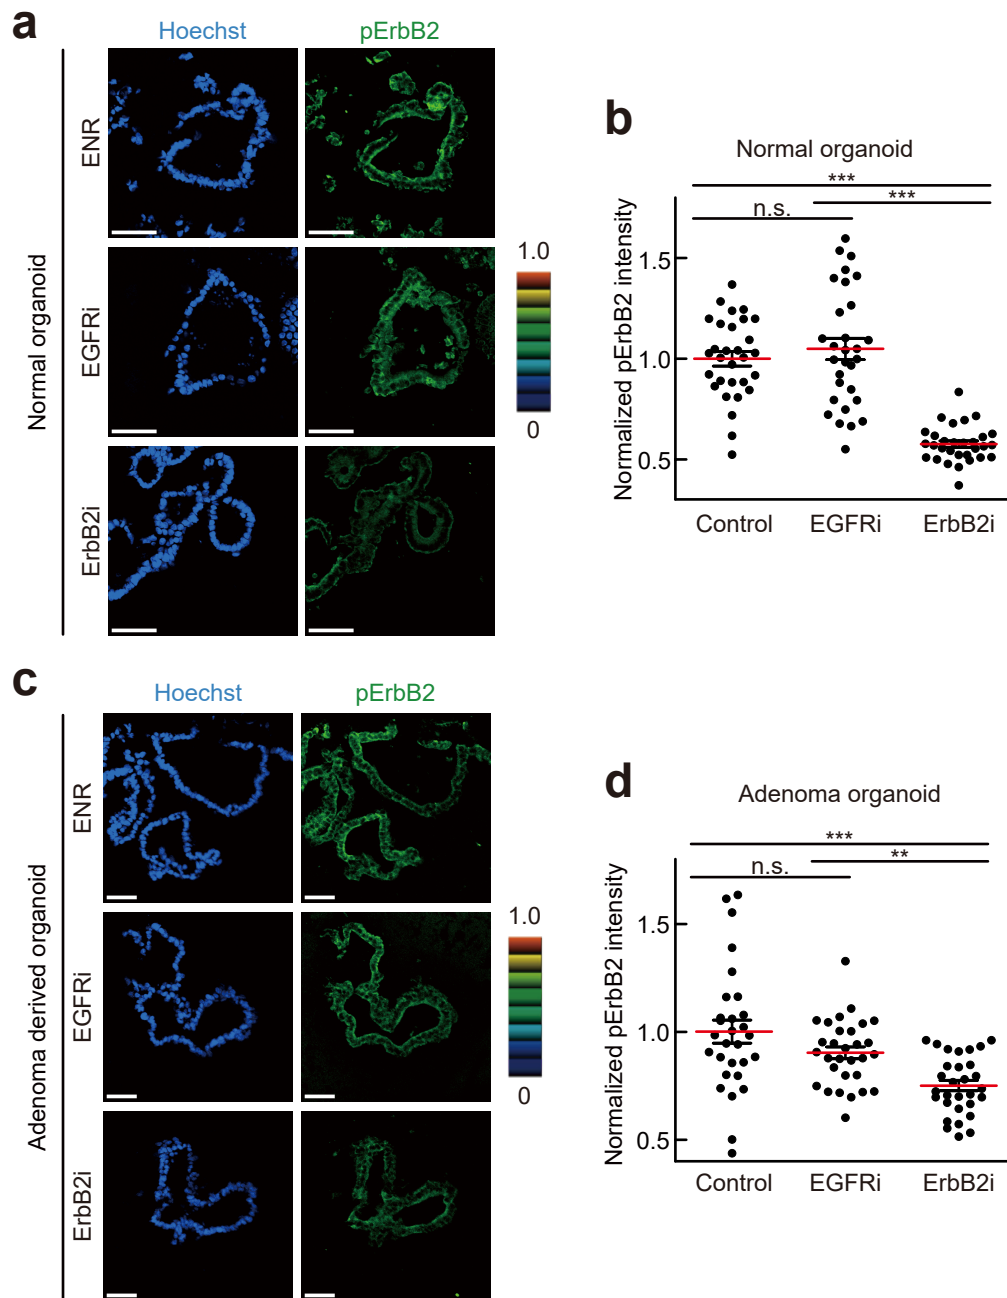

**Supplementary Figure 8. Immunofluorescence staining of normal and adenoma organoids with anti-phosphorylated ErbB2.** (a, b) Normal organoids were treated with either EGFRi or ErbB2i for 1 h, and immunofluorescence staining with an anti-phosphorylated ErbB2 (pErbB2) antibody was performed. The nuclei of cells were co-stained with Hoechst. (b) Bee swarm plots of pErbB2 staining intensity under each condition (n = 30 cells pooled from 2 organoids). (c, d) Adenoma-derived organoids were treated with either EGFRi or ErbB2i for 1 h, and immunofluorescence staining with an anti-pErbB2 antibody was performed. The nuclei of cells were co-stained with Hoechst. (d) Bee swarm plots of pErbB2 staining intensity under each condition (Control: n = 29, EGFRi: n = 30, and ErbB2i: n = 30 cells). Scale bars, 50  $\mu$ m. Red lines represent mean. Error bars represent s.e.m. Steel-Dwass test (b, d) was used for comparison. \*P < 0.05, \*\* P < 0.001, \*\*\*P < 0.0001, n.s., not significant.

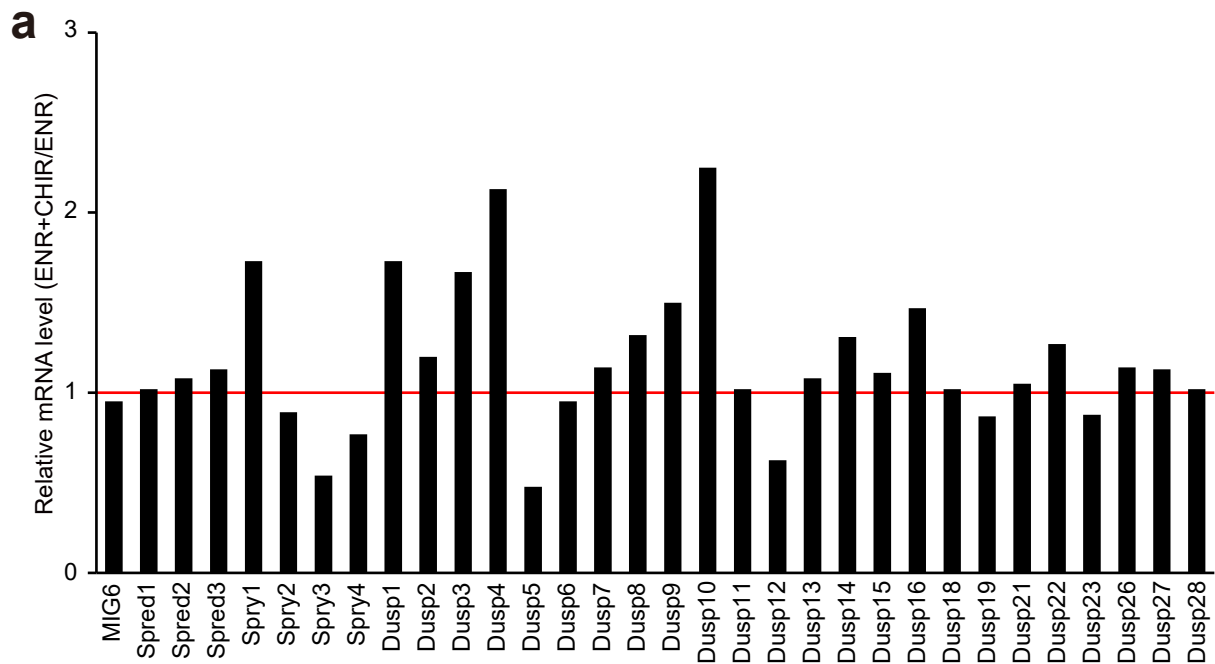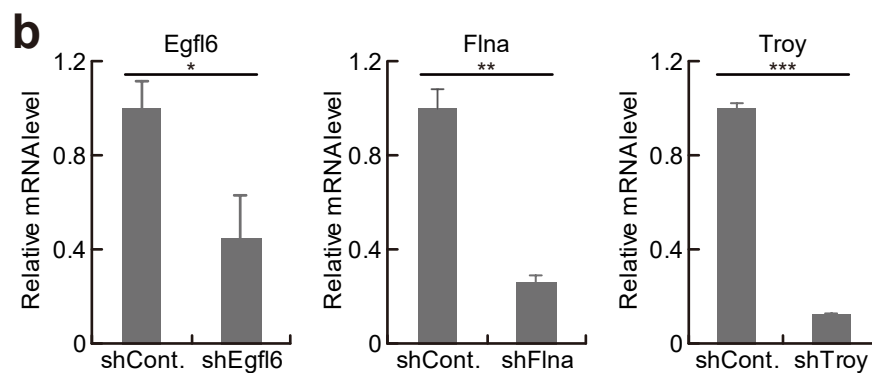

**Supplementary Figure 9. Wnt signalling mediated EGFR regulators.** (a) The relative mRNA levels of indicated genes were obtained from microarray analysis. (b) The relative mRNA levels of Egfl6 (left), Flna (middle), or Troy (right) in organoids expressing a control shRNA (shCont.), or a shRNA for Egfl6 (shEgfl6), Flna (shFlna), or Troy (shTroy) were analysed by RT-PCR (n = 5 samples respectively). Red lines represent mean. Error bars represent s.e.m. Welch's t test (b) was used for comparison. \*P < 0.05, \*\* P < 0.001, \*\*\*P < 0.0001, n.s., not significant.

**Supplementary Table 1. Gene sets enriched in the CHIR99021-dependent upregulated or downregulated genes**

| Upregulated gene sets                        |                         |                                                                                                                                                                                                                                                                                                                                                                                                                      |                        |        |          |             |
|----------------------------------------------|-------------------------|----------------------------------------------------------------------------------------------------------------------------------------------------------------------------------------------------------------------------------------------------------------------------------------------------------------------------------------------------------------------------------------------------------------------|------------------------|--------|----------|-------------|
| Gene set name                                | # Genes in gene set (K) | Description                                                                                                                                                                                                                                                                                                                                                                                                          | # Genes in overlap (k) | k/K    | p-value  | FDR q-value |
| SANSOM_WNT_PATHWAY_REQUIRE_MYC               | 58                      | Wnt target genes up-regulated after Cre-lox knockout of APC [GeneID=324] in the small intestine that require functional MYC [GeneID=4609].                                                                                                                                                                                                                                                                           | 9                      | 0.1552 | 2.59E-16 | 4.61E-12    |
| MEISSNER_BRAIN_HCP_WITH_H3K4ME3_AND_H3K27ME3 | 1069                    | Genes with high-CpG-density promoters (HCP) bearing histone H3 dimethylation at K4 (H3K4me2) and trimethylation at K27 (H3K27me3) in brain.                                                                                                                                                                                                                                                                          | 19                     | 0.0178 | 1.64E-15 | 1.14E-11    |
| PASINI_SUZ12_TARGETS_DN                      | 315                     | Genes down-regulated in ES (embryonic stem cells) with deficient SUZ12 [GeneID=23512].                                                                                                                                                                                                                                                                                                                               | 13                     | 0.0413 | 1.92E-15 | 1.14E-11    |
| HALLMARK_EPITHELIAL_MESENCHYMAL_TRANSITION   | 200                     | Genes defining epithelial-mesenchymal transition, as in wound healing, fibrosis and metastasis.                                                                                                                                                                                                                                                                                                                      | 11                     | 0.055  | 1.39E-14 | 6.18E-11    |
| GO_LOCOMOTION                                | 1114                    | Self-propelled movement of a cell or organism from one location to another.                                                                                                                                                                                                                                                                                                                                          | 18                     | 0.0162 | 5.16E-14 | 1.84E-10    |
| Downregulated gene sets                      |                         |                                                                                                                                                                                                                                                                                                                                                                                                                      |                        |        |          |             |
| Gene set name                                | # Genes in gene set (K) | Description                                                                                                                                                                                                                                                                                                                                                                                                          | # Genes in overlap (k) | k/K    | p-value  | FDR q-value |
| SANSOM_APC_TARGETS_DN                        | 366                     | Top genes down-regulated at day 5 of Cre-Lox induced APC [GeneID=324] knockout in the intestine.                                                                                                                                                                                                                                                                                                                     | 52                     | 0.1421 | 1.58E-61 | 2.81E-57    |
| FEVR_CTNNB1_TARGETS_UP                       | 682                     | Genes up-regulated in intestinal crypt cells upon deletion of CTNNB1 [GeneID=1499].                                                                                                                                                                                                                                                                                                                                  | 53                     | 0.0777 | 1.55E-48 | 1.38E-44    |
| GO_SMALL_MOLECULE_METABOLIC_PROCESS          | 1767                    | The chemical reactions and pathways involving small molecules, any low molecular weight, monomeric, non-encoded molecule.                                                                                                                                                                                                                                                                                            | 66                     | 0.0374 | 1.07E-40 | 6.35E-37    |
| REACTOME_BIOLOGICAL_OXIDATIONS               | 139                     | Genes involved in Biological oxidations                                                                                                                                                                                                                                                                                                                                                                              | 27                     | 0.1942 | 6.51E-36 | 2.90E-32    |
| GO_LIPID_METABOLIC_PROCESS                   | 1158                    | The chemical reactions and pathways involving lipids, compounds soluble in an organic solvent but not, or sparingly, in an aqueous solvent. Includes fatty acids; neutral fats, other fatty-acid esters, and soaps; long-chain (fatty) alcohols and waxes; sphingoids and other long-chain bases; glycolipids, phospholipids and sphingolipids; and carotenes, polyprenols, sterols, terpenes and other isoprenoids. | 52                     | 0.0449 | 1.38E-35 | 4.93E-32    |

**Supplementary Table 2. Target sequences for shRNAs**

| shRNA name | Target sequence (5'-3') |
|------------|-------------------------|
| shFlna     | AAGCTGGAACCTATAGCCTTA   |
| shEgfl6    | AAGAATATTGGCCGATTGAAA   |
| shTroy     | GGGAATGTTTCAGAATCTACT   |
| shEGFR     | ACCGAAATTTGTGCTACGCAA   |
| shErbB2    | AGGAGATCACAGGTTACCTAT   |
